# Supplementary material
Source: publisher figshare collection journal article supplement (https://karger.figshare.com/ndownloader/files/12525746)
Supplement: Supplementary file 1 [file 12525746]

## Sheet: Sheet1
Supplementary Table 1C: Diabetes
	Insulin Short Acting	Insulin Rapid Acting Analogue	Insulin Intermediate Acting	Insulin Long Acting Analogue	Insulin Pre-mix	Glucagon	Metformin	Sulfonylurea
Angola	No	No	No	No	No	No	No	No
Benin	Yes	No	Yes	No	Yes	Yes	Yes	Yes
Botswana	Yes	No	Yes	No	Yes	Yes	Yes	Yes
Burkina Faso	Yes	No	Yes	No	No	No	Yes	Yes
Burundi	Yes	No	Yes	No	No	No	Yes	Yes
Cameroon	Yes	No	Yes	No	Yes	No	Yes	Yes
Cape Verde	Yes	Yes	Yes	Yes	Yes	Yes	Yes	Yes
Central African Republic	Yes	No	Yes	No	No	No	Yes	Yes
Chad	Yes	No	Yes	No	No	No	Yes	Yes
Congo	Yes	No	Yes	No	No	No	Yes	No
Cote Ivoire	Yes	No	Yes	No	No	Yes	Yes	Yes
Democratic Republic of Congo	Yes	No	Yes	No	No	No	Yes	Yes
Eritrea	Yes	No	Yes	Yes	Yes	No	Yes	Yes
Ethiopia	Yes	No	Yes	No	No	Yes	Yes	Yes
Gabon	Yes	No	Yes	No	No	No	Yes	Yes
Gambia	Yes	No	No	No	Yes	No	Yes	Yes
Ghana	Yes	Yes	Yes	Yes	Yes	Yes	Yes	Yes
Guinea	Yes	No	Yes	No	No	No	Yes	Yes
Guinea-Bissau	Yes	No	Yes	No	No	No	Yes	Yes
Kenya	Yes	No	No	No	Yes	No	Yes	Yes
Lesotho	Yes	No	Yes	No	Yes	No	Yes	Yes
Liberia	Yes	No	Yes	No	No	No	Yes	Yes
Madagascar	Yes	No	Yes	No	No	Yes	No	Yes
Malawi	Yes	No	Yes	No	No	No	Yes	Yes
Mali	Yes	No	Yes	No	No	No	Yes	Yes
Mauritania	Yes	No	Yes	No	No	No	Yes	Yes
Mozambique	Yes	No	Yes	No	No	Yes	Yes	Yes
Namibia	Yes	No	Yes	No	Yes	No	Yes	Yes
Niger	Yes	No	Yes	No	No	Yes	Yes	Yes
Nigeria	Yes	No	Yes	No	Yes	No	Yes	Yes
Rwanda	Yes	No	Yes	No	No	No	Yes	Yes
Senegal	Yes	Yes	Yes	Yes	No	No	Yes	Yes
Seychelles	No	Yes	Yes	No	Yes	No	Yes	Yes
Sierra Leone	No	No	No	No	No	No	No	No
South Africa	Yes	Yes	Yes	No	Yes	Yes	Yes	Yes
Southern Sudan	Yes	No	Yes	No	No	No	Yes	No
Swaziland	Yes	No	Yes	No	Yes	No	Yes	Yes
Tanzania	Yes	No	Yes	No	Yes	Yes	Yes	Yes
Togo	Yes	No	No	No	Yes	No	Yes	No
Uganda	Yes	No	Yes	No	Yes	No	Yes	Yes
Zambia	Yes	No	No	Yes	Yes	Yes	Yes	No
Zimbabwe	Yes	No	Yes	No	Yes	No	Yes	Yes
